# Supplementary material for: Design of dispersant structures for preparing highly concentrated one-dimensional inorganic molecular chains from V2Se9 crystals
Source: Royal Society of Chemistry journal article supplement (doi:10.1039/c8cc06767h), 2018-01-01
Supplement: c8cc06767h1.pdf [file c8cc06767h1.pdf]

## Electronic Supporting Information

### Design of dispersant structure for highly concentrated one-dimensional inorganic molecular chain from V<sub>2</sub>Se<sub>9</sub> crystal

Sudong Chae,<sup>†a</sup> Akhtar J. Siddiqi,<sup>†a</sup> Bum Jun Kim,<sup>b</sup> Seungbae Oh,<sup>a</sup> Kyung Hwan Choi,<sup>b</sup> Hyo Yeol Kim,<sup>a</sup> Keun Ho Lee,<sup>a</sup> Hak Ki Yu<sup>c</sup> and Jae-Young Choi<sup>\*a,b</sup>

<sup>a</sup>*School of Advanced Materials Science & Engineering, Sungkyunkwan University, Suwon, 16419, Korea*

<sup>b</sup>*School of Advanced Institute of Nanotechnology (SAINT), Sungkyunkwan University, Suwon, 16419, Korea.*

<sup>c</sup>*Dept. of Materials Science and Engineering & Dept. of Energy Systems Research, Ajou University, Suwon, 16499, Korea*

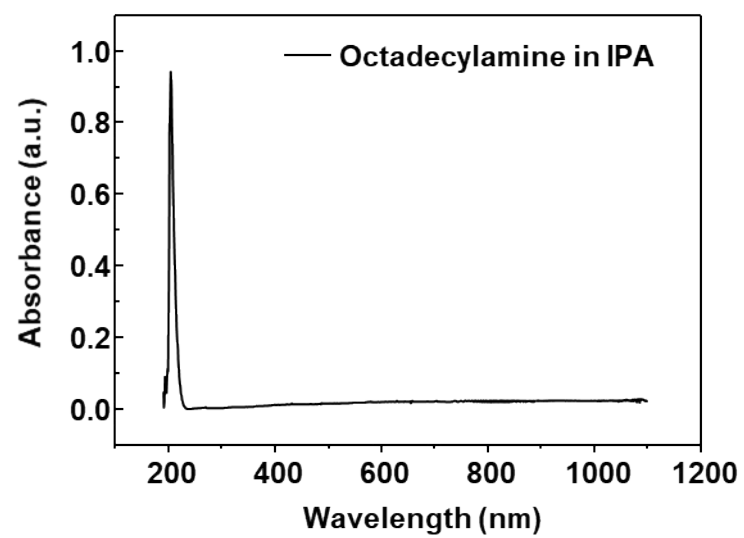

**Figure S1.** UV-vis absorption spectra of the octadecylamine dissolved in isopropyl alcohol.
